# Supplementary material for: Description of a formaldehyde retrieval algorithm for the Geostationary Environment Monitoring Spectrometer (GEMS)
Source: Copernicus journal article supplement (doi:10.5194/amt-2019-2), 2019-02-04
Supplement: Supplementary file [file amt-2019-2-AC4-supplement.pdf]

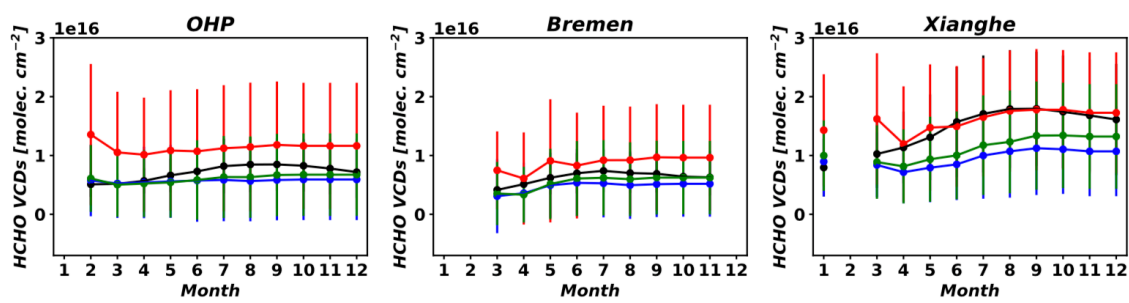

Figure S3. Monthly variations of HCHO VCDs from MAX-DOAS (black) and OMI at OHP, Bremen, and Xianghe. Blue indicates OMHCHO, red indicates QA4ECV, and green indicates GEMS.
